# Supplementary material for: Reuse of Textile Waste to Production of the Fibrous Antibacterial Membrane with Filtration Potential
Source: MDPI journal article supplement (doi:10.3390/nano12010050), 2021-12-24
Supplement: s1 [file s1]

### Supplementary Materials

# Reuse of Textile Waste to Production of the Fibrous Antibacterial Membrane with Filtration Potential

**Alena Opálková Šišková <sup>1,2,\*</sup>, Pavel Pleva <sup>3,\*</sup>, Jakub Hruža <sup>4</sup>, Jaroslava Frajová <sup>5</sup>, Jana Sedlaříková <sup>6</sup>, Petra Peer <sup>3</sup>,  
Angela Kleinová <sup>2</sup> and Magda Janalíková <sup>3</sup>**

- <sup>1</sup> Institute of Materials and Machine Mechanics, Slovak Academy of Sciences, Dúbravská cesta 9, 845 13 Bratislava, Slovakia
  - <sup>2</sup> Polymer Institute of Slovak Academy of Sciences, Dúbravská cesta 9, 845 41 Bratislava, Slovakia; angela.kleinova@savba.sk
  - <sup>3</sup> Department of Environmental Protection Engineering, Faculty of Technology, Tomas Bata University in Zlin, Vavreckova 275, 760 01 Zlin, Czech Republic; peer@utb.cz (P.P.); mjanalikova@utb.cz (M.J.)
  - <sup>4</sup> Institute for Nanomaterials, Advanced Technologies and Innovation, Technical University of Liberec, Studentská 1402/2, 461 17 Liberec, Czech Republic; jakubhruza1@seznam.cz
  - <sup>5</sup> Faculty of Arts and Architecture, Technical University of Liberec, Studentská 1402/2, 460 01 Liberec, Czech Republic; jaroslava.frajova@tul.cz
  - <sup>6</sup> Department of Fat, Surfactant and Cosmetics Technology, Faculty of Technology, Tomas Bata University in Zlin, Vavreckova 275, 760 01 Zlin, Czech Republic; sedlarikova@utb.cz
- \* Correspondence: alena.siskova@savba.sk (A.O.Š.); ppleva@utb.cz (P.P.)

In this supplementary material the following figures are presented:

**Figure S1.** The  $^1\text{H}$  NMR (DMSO- $d_6$ , 400 MHz) spectrum of 1-monolaurin.

**Figure S2.** The  $^{13}\text{C}$  NMR (bottom black line) and DEPT135 (blue top line) spectrum of 1-monolaurin ( $\text{DMSO}-d_6$ , 101 MHz).

**Figure S3.** The pore size distributions of produced fibrous membranes.

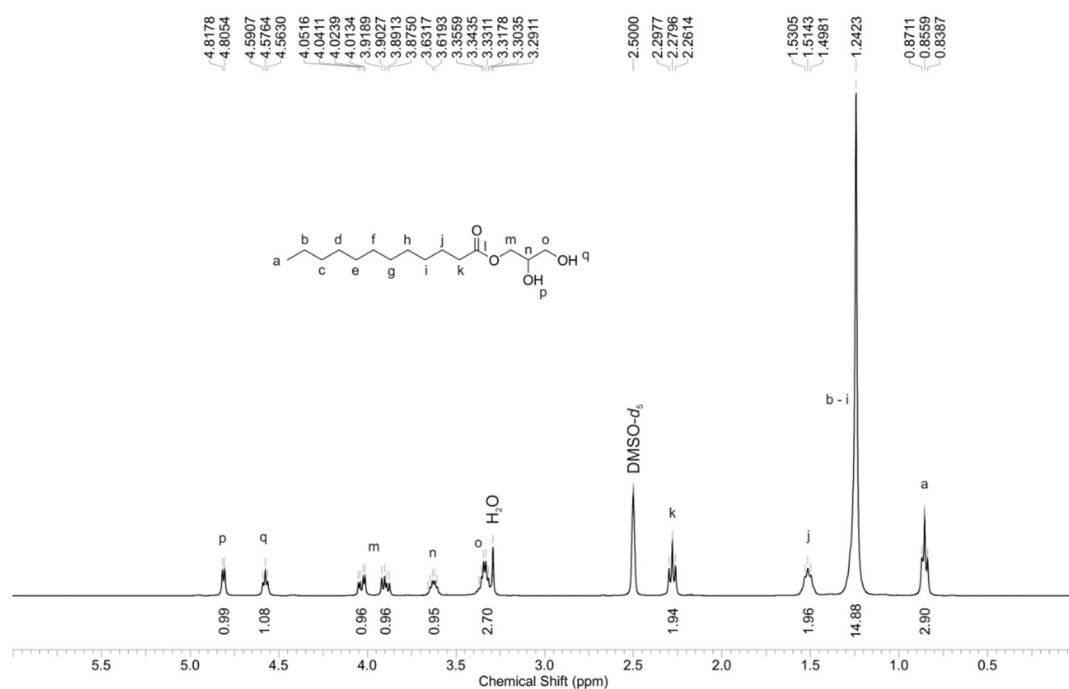

**Figure S1.** The  $^1\text{H}$  NMR (DMSO- $d_6$ , 400 MHz) spectrum of 1-monolaurin.

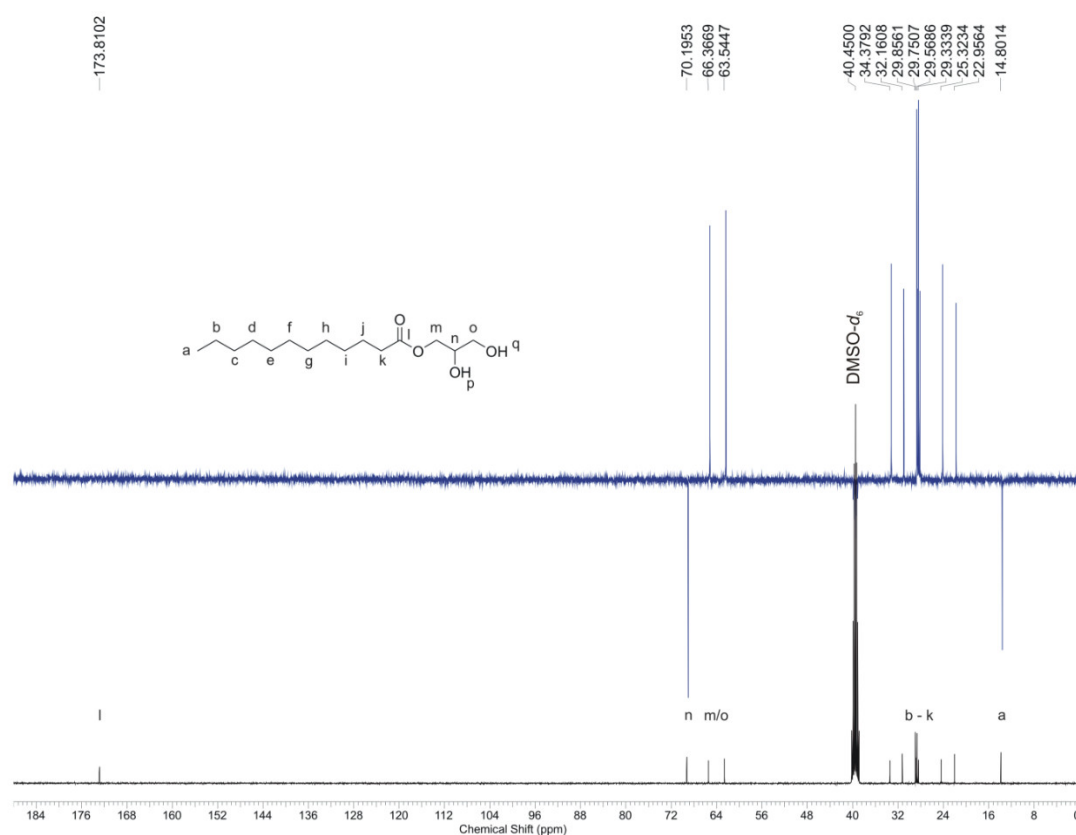

**Figure S2.** The  $^{13}\text{C}$  NMR (bottom black line) and DEPT135 (blue top line) spectrum of 1-monolaurin ( $\text{DMSO-}d_6$ , 101 MHz).

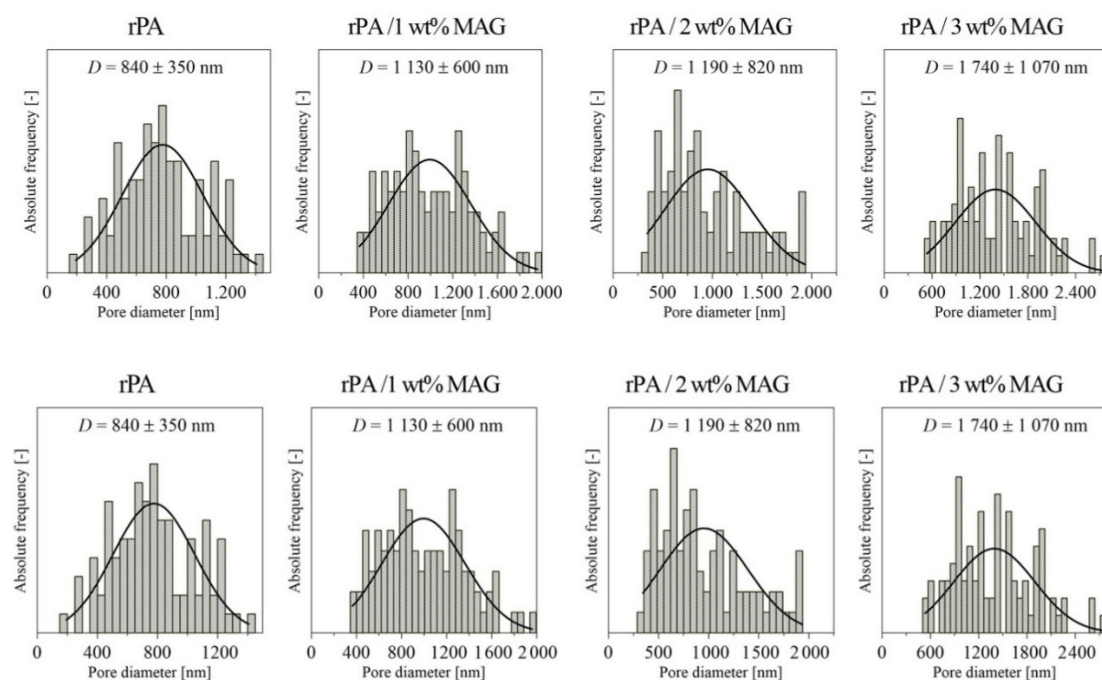

**Figure S3.** The pore size distributions of produced fibrous membranes.
